# Supplementary material
Source: MDPI journal article supplement (https://www.mdpi.com/2073-4395/12/12/3042)
Supplement: s1 [file s1]

## Supplementary Materials

**Table S1:** Description of the test locations used for evaluation of genotypes under fall armyworm infested and non-infested growing conditions in Nigeria in 2021

| Location                                          | Agro-ecological zone | Longitude | Latitude | Altitude (masl) | Treatment                                                     |
|---------------------------------------------------|----------------------|-----------|----------|-----------------|---------------------------------------------------------------|
| University of Ibadan, Ibadan, Oyo State           | FST                  | 3°53'E    | 7°27'N   | 206             | Artificial fall armyworm infestation vs. protected conditions |
| Farm Forte, Benin City, Edo State                 | RF                   | 5°52'E    | 10°14'N  | 280             | Natural armyworm infestation vs. protected conditions         |
| Ndayako Village, Mokwa, Niger State               | SGS                  | 7°35'E    | 9°35'N   | 457             | Natural armyworm infestation vs. protected conditions         |
| College of Agriculture, Lafia, Nassarawa State    | SGS                  | 8°25'E    | 8°29'N   | 383             | Natural armyworm infestation vs. protected conditions         |
| Value Seeds Limited, Bagaddi, Zaria, Kaduna State | NGS                  | 7°48'E    | 11°13'N  | 681             | Natural armyworm infestation vs. protected conditions         |
| Federal University Dustin-Ma, Katsina State       | NGS                  | 7°49'E    | 12°47'N  | 598             | Natural armyworm infestation vs. protected conditions         |

SGS, southern Guinea savanna; NGS, northern Guinea savanna; FST, Forest-Savanna transition zone; RF, Rain Forest.

**Table S2:** Mean squares from the ANOVA for grain yield and agronomic traits of maize hybrids evaluated under artificial, natural FAW-infestations and protected environments, and fall armyworm resistant traits in infested environments in Nigeria

| Source          | DF  | Grain yield | Days to anthesis | Days to silking | Anthesis-silking interval | Plant height | Plant aspect | Husk cover | Ear aspect | DF  | Leaf damage | Ear damage |
|-----------------|-----|-------------|------------------|-----------------|---------------------------|--------------|--------------|------------|------------|-----|-------------|------------|
| TREATMENT (TRT) | 2   | 60596547*** | 142.76***        | 55.28***        | 30.65***                  | 1046.12      | 51.49***     | 34.19***   | 34.59***   | 1   | 596.45***   | 154.92***  |
| REP(TRT)        | 5   | 5665732**   | 11.05            | 6.69            | 1.19                      | 617.26       | 1.81         | 0.63       | 2.75       | 4   | 17.22***    | 3.50*      |
| ENTRY           | 21  | 3634462*    | 80.28***         | 84.40***        | 1.79                      | 2275.56***   | 1.44*        | 1.89       | 1.31       | 21  | 2.73*       | 3.33***    |
| TRT*ENTRY       | 41  | 1620731     | 8.17             | 9.82*           | 2.02**                    | 518.79       | 0.93         | 1.86***    | 1.05       | 21  | 2.41*       | 3.47***    |
| ERROR           | 622 | 1720321.00  | 6.16             | 6.43            | 1.13                      | 162.66       | 0.81         | 0.60       | 0.89       | 414 | 1.31        | 1.07       |

\*, \*\*, \*\*\*:  $p \leq 0.05$ , 0.01, and 0.001

**Table S3:** Mean performance of grain yield, agronomic and fall armyworm (FAW) resistance traits of maize hybrids evaluated under artificial FAW infestation in two growing seasons at Ibadan, Nigeria

| GENOTYPE                     | Grain<br>yield<br>(Kg/ha) | Days to<br>anthesis | Days to<br>silking | Anthesis-<br>silking<br>interval | Plant<br>height<br>(cm) | Plant<br>aspect<br>(1-5) | Husk<br>cover<br>(1-5) | Ear<br>aspect<br>(1-5) | Leaf<br>damage<br>(1-5) | Ear<br>damage<br>(1-5) |
|------------------------------|---------------------------|---------------------|--------------------|----------------------------------|-------------------------|--------------------------|------------------------|------------------------|-------------------------|------------------------|
| AWR SYN-W2 x 1393            | 5813.3                    | 56.0                | 57.3               | 1.3                              | 171.9                   | 3.0                      | 2.9                    | 2.6                    | 4.2                     | 3.4                    |
| AWR SYN-W2 x CML 331         | 4776.7                    | 57.9                | 60.8               | 2.9                              | 148.8                   | 2.7                      | 3.0                    | 3.6                    | 5.9                     | 4.9                    |
| AWR SYN-W2 x CKSBL10060      | 4685.0                    | 53.7                | 56.7               | 3.0                              | 158.5                   | 3.0                      | 3.6                    | 3.3                    | 4.9                     | 4.6                    |
| AMATZBR-WC4 x 1393           | 5463.3                    | 57.0                | 60.0               | 3.0                              | 172.7                   | 2.9                      | 4.1                    | 3.0                    | 4.3                     | 3.3                    |
| AMATZBR-WC4 x CML 331        | 4100.0                    | 56.6                | 60.6               | 4.0                              | 134.2                   | 3.0                      | 3.3                    | 3.4                    | 6.2                     | 4.7                    |
| AMATZBR-WC4 x CKSBL10060     | 5133.3                    | 54.8                | 57.9               | 3.1                              | 177.4                   | 2.4                      | 3.5                    | 2.4                    | 5.9                     | 3.0                    |
| TZBR Eld 4-WC2 x 1393        | 4688.3                    | 57.6                | 59.8               | 2.2                              | 167.0                   | 2.9                      | 2.6                    | 3.0                    | 4.3                     | 3.6                    |
| TZBR Eld 4-WC2 x CML 331     | 3441.7                    | 59.3                | 62.6               | 3.4                              | 133.8                   | 3.0                      | 3.6                    | 3.6                    | 6.2                     | 4.1                    |
| TZBR Eld 4-WC2 x CKSBL10060  | 4428.3                    | 55.2                | 57.4               | 2.2                              | 169.2                   | 3.1                      | 3.4                    | 3.7                    | 5.6                     | 4.4                    |
| TZB-SR x 1393                | 5281.7                    | 55.2                | 57.5               | 2.3                              | 166.4                   | 3.4                      | 4.0                    | 2.7                    | 4.6                     | 3.4                    |
| TZB-SR x CML 331             | 4090.0                    | 58.3                | 61.4               | 3.2                              | 149.8                   | 3.4                      | 3.3                    | 3.4                    | 5.8                     | 4.1                    |
| TZB-SR x CKSBL10060          | 5106.7                    | 55.6                | 57.6               | 2.0                              | 185.1                   | 3.0                      | 3.4                    | 3.0                    | 5.1                     | 3.0                    |
| TZBR Comp 1-WC2 x 1393       | 5483.3                    | 57.4                | 58.6               | 1.3                              | 181.9                   | 2.9                      | 4.0                    | 2.4                    | 4.0                     | 3.0                    |
| TZBR Comp 1-WC2 x CML 331    | 3751.7                    | 57.1                | 59.4               | 2.3                              | 142.7                   | 2.6                      | 3.5                    | 3.9                    | 5.8                     | 5.3                    |
| TZBR Comp 1-WC2 x CKSBL10060 | 4428.3                    | 54.4                | 57.3               | 2.9                              | 166.2                   | 2.6                      | 3.7                    | 3.7                    | 4.7                     | 5.7                    |
| TZBR Comp 2-WC2 x 1393       | 4681.7                    | 59.0                | 60.9               | 1.9                              | 180.3                   | 3.5                      | 3.7                    | 2.7                    | 4.8                     | 4.4                    |
| TZBR Comp 2-WC2 x CML 331    | 4448.3                    | 57.3                | 60.0               | 2.7                              | 156.4                   | 2.7                      | 3.6                    | 3.7                    | 5.3                     | 4.7                    |
| TZBR Comp 2-WC2 x CKSBL10060 | 4896.7                    | 56.1                | 58.3               | 2.2                              | 176.8                   | 2.6                      | 3.4                    | 2.9                    | 4.8                     | 3.5                    |
| 1393 x CML 331               | 4071.7                    | 60.5                | 63.7               | 3.2                              | 138.6                   | 3.0                      | 4.0                    | 3.4                    | 5.2                     | 4.5                    |

|                                                                 |        |      |      |      |       |      |      |      |      |      |
|-----------------------------------------------------------------|--------|------|------|------|-------|------|------|------|------|------|
| 1393 x CKSBL10060                                               | 4221.7 | 53.7 | 55.5 | 1.7  | 147.3 | 3.4  | 2.9  | 3.4  | 5.5  | 4.1  |
| SAMMAZ 22                                                       | 5090.0 | 60.0 | 63.2 | 3.2  | 161.7 | 2.6  | 3.6  | 3.4  | 5.4  | 3.0  |
| TZBR Comp 1-WC2 x TZBR Comp 2-WC2                               | 4456.7 | 58.4 | 60.1 | 1.7  | 173.0 | 3.6  | 3.6  | 3.4  | 4.5  | 3.7  |
| Mean                                                            | 4661.0 | 56.9 | 59.4 | 2.5  | 161.8 | 3.0  | 3.5  | 3.2  | 5.1  | 4.0  |
| LSD (0.05)                                                      | 617.8  | 1.1  | 1.4  | 1.1  | 9.9   | 0.6  | 0.6  | 0.6  | 1.0  | 0.7  |
| CV (%)                                                          | 11.5   | 1.7  | 2.0  | 39.3 | 5.3   | 16.6 | 15.1 | 17.3 | 17.1 | 15.8 |
| LSD: Least significant difference, CV: Coefficient of variation |        |      |      |      |       |      |      |      |      |      |

**Table S4:** Mean performance of grain yield, agronomic and fall armyworm (FAW) resistance traits of maize hybrids evaluated under natural FAW infestation across five locations in Nigeria

| GENOTYPE                          | Grain<br>yield<br>(Kg/ha) | Days to<br>anthesis | Days to<br>silking | Anthesis-<br>silking<br>interval | Plant<br>height<br>(cm) | Plant<br>aspect<br>(1-5) | Husk<br>cover<br>(1-5) | Ear<br>aspect<br>(1-5) | Leaf<br>damage<br>(1-5) | Ear<br>damage<br>(1-5) |
|-----------------------------------|---------------------------|---------------------|--------------------|----------------------------------|-------------------------|--------------------------|------------------------|------------------------|-------------------------|------------------------|
| AWR SYN-W2 x 1393                 | 3670.1                    | 58.9                | 60.3               | 1.5                              | 170.8                   | 3.7                      | 2.7                    | 4.1                    | 2.4                     | 3.3                    |
| AWR SYN-W2 x CML 331              | 3910.5                    | 59.4                | 61.1               | 1.7                              | 161.3                   | 4.1                      | 2.9                    | 4.0                    | 3.4                     | 3.1                    |
| AWR SYN-W2 x CKSBL10060           | 4008.6                    | 54.8                | 56.6               | 1.8                              | 159.6                   | 3.9                      | 2.7                    | 4.0                    | 3.0                     | 2.8                    |
| AMATZBR-WC4 x 1393                | 4095.0                    | 57.7                | 59.3               | 1.6                              | 161.8                   | 3.8                      | 2.3                    | 3.7                    | 3.3                     | 2.5                    |
| AMATZBR-WC4 x CML 331             | 4030.7                    | 61.3                | 62.2               | 1.1                              | 163.9                   | 4.2                      | 3.9                    | 4.0                    | 2.1                     | 1.7                    |
| AMATZBR-WC4 x CKSBL10060          | 4483.7                    | 57.9                | 59.2               | 1.3                              | 165.6                   | 3.5                      | 1.9                    | 3.9                    | 3.8                     | 2.3                    |
| TZBR Eld 4-WC2 x 1393             | 3923.5                    | 58.0                | 60.0               | 2.0                              | 159.5                   | 3.7                      | 2.3                    | 4.0                    | 2.6                     | 2.6                    |
| TZBR Eld 4-WC2 x CML 331          | 3192.1                    | 60.0                | 62.0               | 2.0                              | 153.3                   | 3.7                      | 2.2                    | 4.1                    | 2.9                     | 3.1                    |
| TZBR Eld 4-WC2 x CKSBL10060       | 5058.4                    | 57.3                | 59.3               | 2.0                              | 160.3                   | 3.8                      | 2.7                    | 4.0                    | 2.9                     | 2.9                    |
| TZB-SR x 1393                     | 3479.3                    | 58.8                | 60.4               | 1.6                              | 174.2                   | 4.1                      | 2.4                    | 3.8                    | 3.1                     | 2.7                    |
| TZB-SR x CML 331                  | 4201.2                    | 60.2                | 61.5               | 1.3                              | 155.1                   | 4.6                      | 3.1                    | 4.1                    | 3.6                     | 2.4                    |
| TZB-SR x CKSBL10060               | 4701.8                    | 54.9                | 56.8               | 1.9                              | 170.1                   | 3.7                      | 2.5                    | 4.1                    | 2.5                     | 3.0                    |
| TZBR Comp 1-WC2 x 1393            | 4518.5                    | 59.7                | 61.1               | 1.3                              | 167.5                   | 3.9                      | 2.5                    | 3.6                    | 2.2                     | 2.3                    |
| TZBR Comp 1-WC2 x CML 331         | 3764.9                    | 59.6                | 61.5               | 1.9                              | 151.3                   | 3.9                      | 3.0                    | 3.9                    | 3.1                     | 2.7                    |
| TZBR Comp 1-WC2 x CKSBL10060      | 3955.8                    | 55.1                | 56.8               | 1.7                              | 167.9                   | 3.6                      | 2.9                    | 3.3                    | 2.5                     | 2.8                    |
| TZBR Comp 2-WC2 x 1393            | 3597.8                    | 60.1                | 61.9               | 1.9                              | 161.8                   | 3.7                      | 2.1                    | 4.1                    | 3.4                     | 3.3                    |
| TZBR Comp 2-WC2 x CML 331         | 3786.1                    | 59.9                | 61.8               | 1.9                              | 143.6                   | 4.3                      | 3.0                    | 4.2                    | 2.5                     | 2.3                    |
| TZBR Comp 2-WC2 x CKSBL10060      | 3900.6                    | 58.5                | 60.4               | 1.9                              | 167.1                   | 3.3                      | 2.3                    | 3.6                    | 2.9                     | 2.8                    |
| 1393 x CML 331                    | 3389.7                    | 59.8                | 61.7               | 1.9                              | 155.3                   | 4.6                      | 2.7                    | 4.5                    | 3.0                     | 3.1                    |
| 1393 x CKSBL10060                 | 3450.5                    | 55.1                | 57.1               | 2.0                              | 160.5                   | 3.9                      | 2.8                    | 4.5                    | 2.5                     | 2.2                    |
| SAMMAZ 22                         | 3322.4                    | 60.0                | 61.6               | 1.6                              | 160.2                   | 4.5                      | 2.9                    | 4.1                    | 2.9                     | 3.0                    |
| TZBR Comp 1-WC2 x TZBR Comp 2-WC2 | 3574.0                    | 60.1                | 62.1               | 2.0                              | 163.0                   | 4.2                      | 2.9                    | 3.9                    | 3.2                     | 3.3                    |
| Mean                              | 3909.8                    | 58.5                | 60.2               | 1.7                              | 161.5                   | 4.0                      | 2.7                    | 4.0                    | 2.9                     | 2.7                    |
| LSD (0.05)                        | 807.1                     | 1.4                 | 1.4                | 0.6                              | 15.3                    | 0.6                      | 0.4                    | 0.6                    | 0.7                     | 0.7                    |
| CV (%)                            | 28.7                      | 3.3                 | 3.3                | 51.8                             | 13.1                    | 22.3                     | 21.4                   | 19.7                   | 32.8                    | 35.6                   |

LSD: Least significant difference, CV: Coefficient of variation

**Table S5:** Mean performance of grain yield and agronomic traits of maize hybrids evaluated under insecticide protection across seven environments in Nigeria

| GENOTYPE                          | Grain yield<br>(Kg/ha) | Days to<br>anthesis | Days to<br>silking | Anthesis-<br>silking<br>interval | Plant<br>height<br>(cm) | Plant<br>aspect<br>(1-5) | Husk<br>cover<br>(1-5) | Ear<br>aspect<br>(1-5) |
|-----------------------------------|------------------------|---------------------|--------------------|----------------------------------|-------------------------|--------------------------|------------------------|------------------------|
| AWR SYN-W2 x 1393                 | 5471.0                 | 57.4                | 59.5               | 2.1                              | 177.3                   | 3.2                      | 2.8                    | 3.1                    |
| AWR SYN-W2 x CML 331              | 4453.3                 | 57.5                | 59.7               | 2.2                              | 155.1                   | 3.5                      | 3.5                    | 3.7                    |
| AWR SYN-W2 x CKSBL10060           | 4943.1                 | 54.1                | 56.2               | 2.1                              | 165.7                   | 3.3                      | 3.0                    | 3.6                    |
| AMATZBR-WC4 x 1393                | 4853.9                 | 57.9                | 59.6               | 1.8                              | 177.1                   | 3.7                      | 3.0                    | 3.4                    |
| AMATZBR-WC4 x CML 331             | 4784.9                 | 60.6                | 62.4               | 1.8                              | 158.0                   | 3.1                      | 2.5                    | 3.7                    |
| AMATZBR-WC4 x CKSBL10060          | 4865.2                 | 57.3                | 59.2               | 1.9                              | 166.1                   | 2.3                      | 2.0                    | 3.2                    |
| TZBR Eld 4-WC2 x 1393             | 4617.3                 | 58.7                | 60.8               | 2.1                              | 168.1                   | 3.1                      | 3.1                    | 3.4                    |
| TZBR Eld 4-WC2 x CML 331          | 4800.5                 | 58.6                | 60.4               | 1.8                              | 155.8                   | 3.6                      | 3.0                    | 3.7                    |
| TZBR Eld 4-WC2 x CKSBL10060       | 5267.9                 | 55.8                | 57.6               | 1.8                              | 169.6                   | 3.2                      | 3.3                    | 3.2                    |
| TZB-SR x 1393                     | 4469.9                 | 57.1                | 59.2               | 2.1                              | 174.3                   | 3.5                      | 2.7                    | 3.6                    |
| TZB-SR x CML 331                  | 4436.2                 | 58.7                | 60.6               | 1.9                              | 164.4                   | 3.2                      | 2.3                    | 2.9                    |
| TZB-SR x CKSBL10060               | 5515.9                 | 54.1                | 55.7               | 1.6                              | 178.0                   | 3.0                      | 2.9                    | 3.2                    |
| TZBR Comp 1-WC2 x 1393            | 5253.8                 | 58.0                | 59.4               | 1.4                              | 165.9                   | 3.4                      | 3.2                    | 3.5                    |
| TZBR Comp 1-WC2 x CML 331         | 4873.1                 | 58.8                | 61.1               | 2.3                              | 159.8                   | 3.4                      | 3.6                    | 3.6                    |
| TZBR Comp 1-WC2 x CKSBL10060      | 4746.6                 | 56.1                | 57.8               | 1.6                              | 161.3                   | 3.8                      | 3.5                    | 3.7                    |
| TZBR Comp 2-WC2 x 1393            | 4954.3                 | 59.3                | 61.5               | 2.2                              | 166.5                   | 3.6                      | 3.2                    | 3.8                    |
| TZBR Comp 2-WC2 x CML 331         | 4968.5                 | 59.5                | 61.7               | 2.2                              | 159.0                   | 3.4                      | 3.8                    | 3.7                    |
| TZBR Comp 2-WC2 x CKSBL10060      | 5696.5                 | 56.8                | 58.2               | 1.4                              | 176.9                   | 3.7                      | 3.2                    | 3.0                    |
| 1393 x CML 331                    | 4454.9                 | 57.2                | 58.9               | 1.7                              | 155.3                   | 3.8                      | 3.2                    | 3.7                    |
| 1393 x CKSBL10060                 | 4856.4                 | 55.2                | 57.3               | 2.2                              | 157.6                   | 3.6                      | 2.9                    | 3.4                    |
| SAMMAZ 22                         | 4252.1                 | 59.0                | 61.0               | 2.0                              | 156.5                   | 3.5                      | 3.1                    | 3.5                    |
| TZBR Comp 1-WC2 x TZBR Comp 2-WC2 | 5016.6                 | 57.5                | 59.4               | 2.0                              | 173.6                   | 3.4                      | 3.1                    | 3.7                    |
| Mean                              | 4888.7                 | 57.5                | 59.4               | 1.9                              | 165.5                   | 3.4                      | 3.0                    | 3.5                    |
| LSD                               | 597.3                  | 1.3                 | 1.3                | 0.7                              | 8.9                     | 0.4                      | 0.4                    | 0.4                    |
| CV (%)                            | 20.1                   | 3.7                 | 3.6                | 56.9                             | 8.8                     | 18.1                     | 21.7                   | 20.6                   |

LSD: Least significant difference, CV: Coefficient of variation
